# Supplementary material for: Mathematical Modeling Predicts Response to Chemotherapy and Drug Combinations in Ovarian Cancer
Source: Oxford University Press journal article supplement (doi:10.1158/0008-5472.can-17-3746), 2018-05-16
Supplement: 00085472can173746-sup-193407_2_supp_4722843_p7yyxp.xlsx [file 00085472can173746-sup-193407_2_supp_4722843_p7yyxp.xlsx]

## Sheet: Clinical_combined2
Patient ID	Cohort	Age at Diagnosis	Tumor stage	Bevacizumab maintenance	Chemotherapy	Residual tumor after DS	Primary therapy outcome	Follow up time [months]	Time to progression [months]	Platinum free interval [Months]	Overall survival[months]	MTV before NACT [cm3]	MTV after NACT [cm3]
87	calibration	61	IIIC	Yes	Platinum – Taxane	1 to 10mm	partial response	34.7667	25.9333	18.1		294.12	117.957
109	calibration	66	IIIC	Yes	Platinum – Taxane	1 to 10mm	partial response	22.1667	13.4333	7.36667
174	calibration	75	IIIC	Yes	Platinum – Taxane	> 10mm	partial response	11.0667	10.3667	2.73333
167	calibration	65	IIIC	Yes	Platinum – Taxane	NA	partial response	10.2	-
178	calibration	68	IV	Yes	Platinum – Taxane	1 to 10mm	partial response	7.93333	-
71	calibration	61	IV	Yes	Platinum – Taxane	NA	progressive disease	27.2	3.03333		27.2	279.7	202.6
97	calibration	73	IIIC	Yes	Platinum – Taxane	NA	progressive disease	27.7667	2.46667
64	calibration	38	IV	Yes	Platinum – Taxane	0	complete response	50.3667	14.0333	7.93333
86	calibration	62	IIIC	Yes	Platinum – Taxane	0	complete response	29.0333	15.5667	9.5	29.0333	244.67	38.918
107	calibration	59	IIIC	Yes	Platinum – Taxane	1 to 10mm	complete response	18.4667	11.8	6.9	18.4667
172	calibration	65	IV	Yes	Platinum – Taxane	> 10mm	complete response	12.6333	-
156	calibration	71	IV	Yes	Platinum – Taxane	1 to 10mm	complete response	11.8333	-
176	calibration	66	IIIC	Yes	Platinum – Taxane	1 to 10mm	complete response	10.6333	-
182	calibration	66	IIIC	Yes	Platinum – Taxane	> 10mm	complete response	10.2333	-
17	calibration	65	IIIB	No	Platinum – Taxane	1 to 10mm	complete response	41.1667	13.0333	5.53333	41.1667	194.03	12.421
30	calibration	80	IIIC	No	Platinum	1 to 10mm	complete response	62.2667	-		62.2667	604.62	0
32	calibration	66	IIIC	No	Platinum – Taxane	1 to 10mm	complete response	33.6	15.8333	9.16667	33.6	157.16	36.256
34	calibration	64	IVA	No	Platinum – Taxane	0	complete response	34.5	12.1667	6.56667	34.5	149.61	0
45	calibration	58	IIIC	No	Platinum – Taxane	1 to 10mm	complete response	37.1333	11.1333	3.06667	37.1333
48	calibration	61	IVB	No	Platinum – Taxane	1 to 10mm	complete response	35.7667	9.36667	4.03333	35.7667	351.9	43.023
49	calibration	75	IIIC	No	Platinum – Taxane	1 to 10mm	complete response	45.3667	18.9667	12	45.3667	599.44	72.45
56	calibration	74	IVA	No	Platinum – Taxane	0	complete response	56.7	14.0333	9.43333		227.98	8.81
59	calibration	67	IIIC	No	Platinum – Taxane	0	complete response	55.0667	-			338.31	16.43
60	calibration	66	IVB	No	Platinum – Taxane	1 to 10mm	complete response	54.6333	27.2333	22.0333	54.0333	366.56	23.65
62	calibration	55	IVB	No	Platinum – Taxane	0	complete response	52.7	18.4333	13.0667		278.78	19.862
63	calibration	67	IVA	No	Platinum – Taxane	1 to 10mm	complete response	38.0667	16.8	11.3	38.0667	530.86	51.574
91	calibration	65	IIIC	No	Platinum – Taxane	1 to 10mm	complete response	11.9667	10.1	4.5	11.9667
110	calibration	64	IIIC	No	Platinum – Taxane	1 to 10mm	complete response	21.7	11.3667	5.8
111	calibration	65	IIIC	No	Platinum – Taxane	1 to 10mm	complete response	11.8	-		11.8
157	calibration	69	IIIC	No	Platinum – Taxane	0	complete response	15.1	-
153	calibration	68	IIIC	No	Platinum – Taxane	0	complete response	10.3667	7.86667	2.7
158	calibration	71	IIIC	No	Platinum – Taxane	1 to 10mm	complete response	11.9	-
177	calibration	80	IVA	No	Platinum	0	complete response	10.8	-
175	calibration	60	IIIC	No	Platinum – Taxane		complete response	8.16667	-
203	calibration	73	IIIC	No	Platinum – Taxane	0	complete response	6.5	-
84	calibration	74	IIIC	No	Platinum	NA	NA	2.1	-		2.1
4	calibration	61	IVB	No	Platinum – Taxane	1 to 10mm	partial response	22.0333	10.5333	3.53333	22.0333	681.9	86.26
12	calibration	76	IIIC	No	Platinum – Taxane	1 to 10mm	partial response	28.6333	16.3333	9.1	28.6333	607.01	156.16
14	calibration	59	IVB	No	Platinum – Taxane	1 to 10mm	partial response	45.3333	17.5	7.06667	45.3333	309.92	8.999
18	calibration	64	IIIC	No	Platinum – Taxane	1 to 10mm	partial response	19.7	10.7333	3.33333	19.7	396.24	7.82
40	calibration	69	IVB	No	Platinum – Taxane	1 to 10mm	partial response	65.3	19.9667	12.5		609.57	55.334
155	calibration	59	IIIC	No	Platinum	0	partial response	15.2	12.0667	4.13333
147	calibration	71	IIIC	No	Platinum – Taxane	NA	partial response	12.9333	-
170	calibration	73	IVA	No	Platinum – Taxane	0	partial response	12.6	-
1	calibration	51	IVB	No	Platinum – Taxane	> 10mm	progressive disease	18.4333	5.83333	1	18.4333	568.82	83.914
44	calibration	71	IVA	No	Platinum – Taxane	1 to 10mm	progressive disease	26.7333	6.03333	0.633333	26.7333	197.26	53.03
54	calibration	57	IIIC	No	Platinum – Taxane	0	progressive disease	17.5667	6.76667	0.566667	17.5667
58	calibration	63	IIIC	No	Platinum – Taxane	1 to 10mm	progressive disease	13.8	6.96667	0	13.8	267.07	104.259
68	calibration	63	IVA	No	Platinum – Taxane	1 to 10mm	progressive disease	11.2333	9.26667	1.03333	11.2333	485.47	51.14
73	calibration	57	IVB	No	Platinum – Taxane	1 to 10mm	progressive disease	10.8667	6.93333	0.666667	10.8667	787.11	58.64
136	calibration	72	IIIC	No	Platinum – Taxane	0	progressive disease	11.9	4.16667	0	11.9
195	calibration	68	IVB	No	Platinum – Taxane	NA	progressive disease	6.2	3.2
19	calibration	63	IVB	No	Platinum – Taxane	NA	progressive disease	34.2667	2.4		34.2667	548.56	417.077
22	calibration	66	IIIC	No	Platinum – Taxane	NA	progressive disease	4	3.1		4	511.33	23.967
33	calibration	72	IIIC	No	Platinum – Taxane	NA	progressive disease	19.4333	2.8		19.4333	160.26	35.777
39	calibration	80	IVA	No	Platinum	NA	progressive disease	5.7	2.43333		5.7	222.46	142.126
79	calibration	60	IIIC	No	Platinum – Taxane	NA	progressive disease	39.4	3.7
85	calibration	44	IVB	No	Platinum – Taxane	NA	progressive disease	5.86667	3.53333	0.5	5.86667
106	calibration	78	IIIC	No	Platinum	NA	progressive disease	23.3667	2.83333
123	calibration	65	IIIC	No	Platinum	NA	progressive disease	3.03333	1.16667		3.03333
150	calibration	82	IIIC	No	Platinum	NA	progressive disease	12.3667	2.1	0.533333
160	calibration	83	IIIC	No	Platinum	NA	progressive disease	2.33333	1.06667	0.466667	2.33333
TCGA-31-1944	validation	47	Stage IIIC	No	Platinum-Taxane	No Macroscopic disease	Complete response	46.2	22.6	15.1667	46.2
TCGA-29-1693	validation	72	Stage IIIC	No	Platinum-Taxane	>10 mm	Complete response	103.2	23.1333	16.7667	103.2
TCGA-13-0891	validation	73	Stage IV	No	Platinum-Taxane	No Macroscopic disease	Complete response	69.9667	25.4	19.3	69.9667
TCGA-13-0805	validation	57	Stage IIIC	No	Platinum-Taxane	1-10 mm	Progressive Disease	35.7667	5.9	0.866667	35.8
TCGA-30-1891	validation	61	Stage IIIC	No	Platinum-Taxane	1-10 mm	Partial response	30.4667	6.03333	1.33333	30.4667
TCGA-04-1530	validation	68	Stage IIIC	No	Platinum-Taxane	1-10 mm	Complete response	-	11.6667	6.56667	120.733
TCGA-23-1026	validation	45	Stage IIIC	No	Platinum-Taxane	1-10 mm	Complete response	27.2	26.5667	22.9667	27.2
TCGA-24-1562	validation	67	Stage IIIC	No	Platinum-Taxane	1-10 mm	Complete response	46.1333	7.63333	2.56667	46.1333
TCGA-36-1580	validation	82	Stage IIIC	No	Platinum	>10 mm	NA	24.5667	14.6667	3.06667	24.5667
TCGA-24-1614	validation	57	Stage IIIC	No	Platinum-Taxane	1-10 mm	Complete response	49	21.4667	15.2	49
TCGA-29-1775	validation	51	Stage IIIC	Yes	Platinum-Taxane	1-10 mm	Complete response	12.5333	11.3667	0.7	12.5333
TCGA-29-2414	validation	75	Stage IIIC	No	Platinum-Taxane	>10 mm	Complete response	87.3667	18.4	14.0333	87.3667
TCGA-30-1866	validation	61	Stage IV	No	Platinum-Taxane	1-10 mm	Complete response	37.1333	9.5	5.3	37.1333
TCGA-24-1616	validation	56	Stage IIIC	No	Platinum-Taxane	1-10 mm	Complete response	38.7667	13.5	8	38.7667
TCGA-29-1785	validation	55	Stage IIIC	No	Platinum-Taxane	>10 mm	Complete response	35.1	15.7667	10.5667	36.8
TCGA-29-1704	validation	61	Stage IIIC	No	Platinum-Taxane	>10 mm	Complete response	52.9	18.9333	13.3	52.9
TCGA-24-0982	validation	77	Stage IIIC	No	Platinum-Taxane	1-10 mm	Complete response	22.6333	5.1	0.933333	22.6333
TCGA-36-1576	validation	76	Stage IIIC	No	Platinum-Taxane	>10 mm	Complete response	30.5	27.2333	19.8333	30.5
TCGA-24-1464	validation	70	Stage IIIC	No	Platinum-Taxane	>10 mm	NA	12.6333	10.7667	5.33333	12.6333
TCGA-24-2020	validation	67	Stage IIIC	No	Platinum-Taxane	1-10 mm	Complete response	154.133	24.1	10.3	154.133
TCGA-61-1738	validation	60	Stage IIIC	No	Platinum-Taxane	1-10 mm	Progressive Disease	36.3	9.2	4.7	36.3
TCGA-24-2030	validation	87	Stage IIIC	No	Platinum-Taxane	>10 mm	Complete response	54.7	21.5333	17.3	56.7
TCGA-25-1318	validation	54	Stage IIIC	No	Platinum-Taxane	1-10 mm	Partial response	35.4667	6.16667	2.1	35.4667
TCGA-13-0725	validation	44	Stage IIIC	No	Platinum-Taxane	1-10 mm	Complete response	12.5667	6.33333	1.96667	12.5667
TCGA-31-1946	validation	30	Stage IIIC	No	Platinum-Taxane	No Macroscopic disease	NA	30.6	22.1333	20.7	30.6
TCGA-29-2427	validation	60	Stage IIIC	No	Platinum-Taxane	>10 mm	Complete response	63.3333	52.7333	51.1	63.3333
TCGA-13-1500	validation	71	Stage IIIC	No	Platinum-Taxane	>10 mm	Partial response	14.1667	8.43333	0.933333	14.1667
TCGA-61-1741	validation	76	Stage IIIB	No	Platinum-Taxane	>10 mm	Complete response	34.1333	16.2667	10.2667	34.1333
TCGA-61-2009	validation	65	Stage IIIC	No	Platinum-Taxane	>10 mm	Complete response	40.4	3.36667	0.6	40.4
TCGA-61-2610	validation	61	Stage IIIC	No	Platinum-Taxane	>10 mm	Stable Disease	52.6333	17.4667	5.56667	52.6333
TCGA-23-2077	validation	45	Stage IIIC	No	Platinum-Taxane	No Macroscopic disease	Complete response	117.5	41.0667	35.9	117.5
TCGA-23-1110	validation	42	Stage IIIC	No	Platinum-Taxane	No Macroscopic disease	Complete response	55.2667	10.8667	3.03333	55.2667
TCGA-42-2588	validation	61	Stage IV	No	Platinum-Taxane	>10 mm	Progressive Disease	9.56667	3.73333	0.266667	9.56667
TCGA-24-1563	validation	66	Stage IIIC	No	Platinum-Taxane	1-10 mm	Complete response	48.3667	13.2	8.4	48.3667
TCGA-23-1124	validation	62	Stage IIIC	No	Platinum	No Macroscopic disease	Complete response	-	21.3667	14.8	58.9333
TCGA-30-1853	validation	58	Stage IIIC	No	Platinum-Taxane	1-10 mm	Complete response	36.7667	21.1333	16.9333	36.7667
TCGA-24-1550	validation	49	Stage IIIC	No	Platinum-Taxane	1-10 mm	Complete response	41.6333	29.7333	23.9333	41.6333
TCGA-13-1495	validation	60	Stage IIIC	No	Platinum-Taxane	1-10 mm	Complete response	49.9333	32.5667	14.3	49.9333
TCGA-61-2109	validation	40	Stage IIIC	No	Platinum-Taxane	>10 mm	NA	20.9667	15.5	7.06667	20.9667
TCGA-25-1623	validation	71	Stage IV	No	Platinum-Taxane	No Macroscopic disease	Complete response	18.8333	11.4	6.8	18.8333
TCGA-24-2024	validation	72	Stage IIIC	No	Platinum-Taxane	1-10 mm	Complete response	58.9667	14.0333	10.0333	58.9667
TCGA-24-1567	validation	54	Stage IIIB	No	Platinum-Taxane	1-10 mm	NA	17.4667	10.6333	5.53333	17.4667
TCGA-13-0720	validation	48	Stage IIIC	No	Platinum-Taxane	1-10 mm	Complete response	45.1667	9.73333	3.73333	45.1667
TCGA-24-1466	validation	74	Stage IIIC	No	Platinum-Taxane	1-10 mm	Complete response	45.7667	16.3667	11.5333	45.7667
TCGA-57-1586	validation	66	Stage IIIC	No	Platinum-Taxane	>10 mm	NA	22.6333	8.63333	3.2	22.6333
TCGA-13-0893	validation	48	Stage IIIC	No	Platinum-Taxane	>10 mm	Partial response	43.9667	15.3667	5.9	43.9667
TCGA-24-1545	validation	69	Stage IIIC	No	Platinum-Taxane	>10 mm	Complete response	58.2	28.7	19.2	58.2
TCGA-13-1817	validation	56	Stage IIIC	No	Platinum-Taxane	>10 mm	Partial response	34.1333	18.0333	7.43333	34.1333
TCGA-61-2611	validation	40	Stage IIIC	No	Platinum-Taxane	1-10 mm	Complete response	16.1	12.7667	2.23333	16.1
TCGA-61-1725	validation	40	Stage IIIC	No	Platinum-Taxane	>10 mm	Stable Disease	31.8667	28.1333	8.9	31.8667
TCGA-24-2295	validation	69	Stage IIIC	No	Platinum-Taxane	>10 mm	Complete response	33.5667	9.36667	4.93333	33.5667
TCGA-23-2072	validation	58	Stage IV	No	Platinum-Taxane	>10 mm	Complete response	-	15.8667	10.8333	25.3
TCGA-24-2033	validation	87	Stage IIIC	No	Platinum-Taxane	>10 mm	Partial response	18.7333	11.7	3.96667	18.7333
TCGA-04-1517	validation	79	Stage IIIC	No	Platinum-Taxane	>10 mm	Complete response	-	11.6333	6.83333	20.2667
TCGA-23-1023	validation	65	Stage IIIC	No	Platinum-Taxane	1-10 mm	Complete response	41.1	16.3333	0.733333	41.1
TCGA-30-1892	validation	52	Stage IIIC	No	Platinum-Taxane	1-10 mm	Complete response	49.4667	8.43333	4.03333	49.4667
TCGA-09-0366	validation	55	Stage IIIC	No	Platinum-Taxane	1-10 mm	Stable Disease	-	6.33333	2.56667	58.5667
TCGA-13-0791	validation	58	Stage IIIC	No	Platinum-Taxane	No Macroscopic disease	Complete response	39.4667	9.36667	4.66667	39.4667
TCGA-24-1548	validation	57	Stage IIIC	No	Platinum-Taxane	1-10 mm	Complete response	16.4333	6.9	2.8	16.4333
TCGA-04-1654	validation	69	Stage IIIC	No	Platinum-Taxane	1-10 mm	NA	-	26.9333	25.2	48.3667
TCGA-13-0908	validation	58	Stage IV	No	Platinum-Taxane	1-10 mm	Complete response	45.4667	18.4	10.2667	45.4667
TCGA-25-2398	validation	71	Stage IIIC	No	Platinum-Taxane	1-10 mm	Complete response	45.6333	19.2333	14.2	45.6333
TCGA-24-1435	validation	57	Stage IIIC	No	Platinum-Taxane	1-10 mm	Complete response	44.1333	16.8333	11.8667	44.1333
TCGA-13-0765	validation	50	Stage IIIC	Yes	Platinum-Taxane	1-10 mm	Complete response	28.9667	22.2667	0.466667	28.9667
TCGA-24-2260	validation	74	Stage IIIB	No	Platinum-Taxane	1-10 mm	Complete response	36.6667	22.2333	17.7333	36.6667
TCGA-04-1331	validation	78	Stage IIIC	No	Platinum-Taxane	1-10 mm	Complete response	40.8	15.3	9.66667	44.5333
TCGA-25-2404	validation	38	Stage IIIC	No	Platinum-Taxane	No Macroscopic disease	Complete response	29.4333	14.2	10.1333	29.4333
TCGA-13-0883	validation	61	Stage IIIC	No	Platinum-Taxane	1-10 mm	Complete response	69.9	27.3	15.6333	69.9
TCGA-13-1501	validation	50	Stage IV	No	Platinum-Taxane	>10 mm	Partial response	33.3	13.0667	6.96667	33.3
TCGA-13-1482	validation	52	Stage IV	No	Platinum-Taxane	>10 mm	Partial response	62.5667	20.0667	15	62.5667
TCGA-24-1564	validation	67	Stage IIIC	No	Platinum-Taxane	1-10 mm	Complete response	26.2333	7.36667	3.5	26.2333
TCGA-13-0897	validation	54	Stage IIIC	No	Platinum-Taxane	1-10 mm	Complete response	58.2667	18.4667	13.8	58.2667
TCGA-24-1431	validation	67	Stage IIIC	No	Platinum-Taxane	1-10 mm	NA	19.4333	6.63333	1.73333	18.9
TCGA-36-1574	validation	48	Stage IIIC	No	Platinum-Taxane	>10 mm	Complete response	22.8667	21.6	14.8	22.8667
TCGA-61-1728	validation	59	Stage IV	No	Platinum-Taxane	1-10 mm	Complete response	28.2667	17.7667	10.9667	28.2667
TCGA-36-2529	validation	71	Stage IIIC	No	Platinum-Taxane	>10 mm	Complete response	35.5333	18.9	14.3667	35.5333
TCGA-24-1924	validation	65	Stage IIIC	No	Platinum-Taxane	1-10 mm	Complete response	30.6333	10.6667	5.3	30.6333
TCGA-24-1467	validation	51	Stage IIIC	No	Platinum-Taxane	1-10 mm	Complete response	107.467	41.7667	38.1	107.467
TCGA-36-2551	validation	57	Stage IIIC	No	Platinum-Taxane	>10 mm	Complete response	16.4	11.2667	4.66667	16.4
TCGA-24-1103	validation	50	Stage IIIC	No	Platinum-Taxane	1-10 mm	Complete response	54.8667	22.6	18.3667	54.8667
TCGA-13-0724	validation	72	Stage IV	No	Platinum	1-10 mm	Progressive Disease	2.76667	2.76667	0.266667	2.76667
TCGA-24-1560	validation	51	Stage IIIC	No	Platinum-Taxane	1-10 mm	Complete response	44.7	4.76667	0.866667	44.7
TCGA-36-2548	validation	57	Stage IIIC	No	Platinum-Taxane	>10 mm	NA	14.3667	13.1667	4.26667	14.3667
TCGA-29-1762	validation	59	Stage IV	No	Platinum-Taxane	>10 mm	Complete response	86.8667	45.8333	41.1667	87.8
TCGA-24-1104	validation	56	Stage IV	No	Platinum-Taxane	>10 mm	Complete response	64.4333	31.9667	26.1333	64.4333
TCGA-31-1951	validation	58	Stage IIIC	No	Platinum-Taxane	No Macroscopic disease	NA	22.8	21.9667	17.1	22.8
TCGA-13-0727	validation	71	Stage IIIC	No	Platinum-Taxane	1-10 mm	Complete response	15.4	8.43333	4.43333	15.4
TCGA-24-1565	validation	74	Stage IIIC	No	Platinum-Taxane	1-10 mm	Partial response	10.4	4.83333	0.733333	10.4
TCGA-23-2084	validation	45	Stage IV	No	Platinum-Taxane	No Macroscopic disease	Complete response	-	20.6333	15.4667	50.5333
TCGA-24-1474	validation	57	Stage IIIC	No	Platinum-Taxane	1-10 mm	Partial response	22.5333	11.0667	6.96667	22.5333
TCGA-10-0937	validation	44	Stage IIIC	No	Platinum-Taxane	1-10 mm	Complete response	15.3333	7.83333	2.96667	20.2667
TCGA-10-0930	validation	70	Stage IIIC	No	Platinum-Taxane	1-10 mm	Complete response	33.7	22.6667	18.5333	34.6667
TCGA-13-0793	validation	40	Stage IV	No	Platinum-Taxane	1-10 mm	Complete response	29.1	11.7	6.4	29.1
TCGA-25-1316	validation	55	Stage IIIC	No	Platinum-Taxane	1-10 mm	Progressive Disease	37.5333	9.2	2.06667	42.6333
TCGA-13-0795	validation	66	Stage IIIC	No	Platinum-Taxane	>10 mm	Complete response	19.8667	10.8333	4	19.8667
TCGA-13-0911	validation	55	Stage IV	No	Platinum-Taxane	1-10 mm	Partial response	28.1	9.3	3	28.1
TCGA-24-1552	validation	77	Stage IIIC	No	Platinum-Taxane	1-10 mm	Complete response	41.9667	13.4333	4.6	41.9667
TCGA-13-0920	validation	65	Stage IIIC	No	Platinum	1-10 mm	Complete response	14	9.9	4.86667	14
TCGA-29-1771	validation	76	Stage IIIC	No	Platinum-Taxane	>10 mm	Complete response	22.8667	19.8333	15.1667	22.8667
TCGA-13-1477	validation	49	Stage IV	No	Platinum-Taxane	1-10 mm	Progressive Disease	55.4	7.83333	0.966667	55.4
TCGA-13-1485	validation	48	Stage IV	No	Platinum-Taxane	1-10 mm	Partial response	20.9667	5.66667	0.7	20.9667
TCGA-61-2000	validation	67	Stage IIIC	No	Platinum-Taxane	No Macroscopic disease	Stable Disease	14.7	11.3	3.6	14.7
TCGA-30-1860	validation	58	Stage IIIC	No	Platinum-Taxane	>10 mm	Complete response	45.5333	13.2333	6.33333	45.5333
TCGA-24-1927	validation	59	Stage IIIC	No	Platinum-Taxane	1-10 mm	Complete response	16.6667	9.66667	5.26667	16.6667
TCGA-13-1498	validation	73	Stage IIIC	No	Platinum-Taxane	>10 mm	Partial response	38.1333	17.8	10.6	38.1333
TCGA-25-1328	validation	38	Stage IIIC	No	Platinum-Taxane	1-10 mm	Partial response	65.9667	8.13333	1	66.9667
TCGA-10-0934	validation	50	Stage IIIC	No	Platinum-Taxane	1-10 mm	Progressive Disease	3.96667	3.7	1.83333	6.8
TCGA-36-1578	validation	63	Stage IV	No	Platinum-Taxane	>10 mm	NA	28.2333	10.3333	3.26667	28.2333
TCGA-36-2530	validation	38	Stage IIIC	No	Platinum-Taxane	>10 mm	Complete response	33.4667	21	16.5	33.4667
TCGA-04-1348	validation	44	Stage IIIB	No	Platinum-Taxane	1-10 mm	Complete response	-	19.1667	13.0333	49.4333
TCGA-24-1553	validation	53	Stage IIIB	No	Platinum-Taxane	1-10 mm	Complete response	58.9	18.4333	13.3	58.9
TCGA-29-1691	validation	51	Stage IIIC	No	Platinum-Taxane	1-10 mm	Complete response	47.8333	20.4333	15.8667	49
TCGA-04-1338	validation	78	Stage IIIC	No	Platinum-Taxane	1-10 mm	NA	47.2667	12.6667	5.96667	47.2667
TCGA-61-1906	validation	55	Stage IIIC	No	Platinum-Taxane	>10 mm	Complete response	34.6	7.86667	2.76667	34.6
TCGA-13-0717	validation	54	Stage IIIC	No	Platinum-Taxane	>10 mm	Complete response	24.9333	9.8	3.73333	24.9333
TCGA-13-0913	validation	53	Stage IIIC	No	Platinum-Taxane	No Macroscopic disease	Complete response	30.4	29.0333	23.6667	30.4
TCGA-13-0757	validation	71	Stage IIIC	No	Platinum-Taxane	1-10 mm	Complete response	11.3333	9.76667	0.866667	11.3333
TCGA-13-0766	validation	42	Stage IIIC	No	Platinum-Taxane	1-10 mm	Complete response	21.7	20.9333	14.8667	21.7
TCGA-13-0758	validation	60	Stage IV	No	Platinum-Taxane	1-10 mm	Partial response	11.5333	7.06667	1.7	11.5333
TCGA-25-2399	validation	80	Stage IIIC	No	Platinum-Taxane	>10 mm	Partial response	20.2667	8.1	2.03333	20.2667
TCGA-23-1022	validation	67	Stage IIIC	No	Platinum-Taxane	1-10 mm	Complete response	-	15	9.6	50.3667
TCGA-24-2029	validation	75	Stage IIIC	No	Platinum-Taxane	>10 mm	Complete response	14.6333	12.4	5.13333	14.6333
TCGA-13-0887	validation	42	Stage IIIC	No	Platinum-Taxane	1-10 mm	Complete response	67.6	17.1333	8.2	67.6
TCGA-13-0764	validation	62	Stage IV	Yes	Platinum-Taxane	1-10 mm	Partial response	31.4667	9.06667	3.73333	31.4667
TCGA-30-1714	validation	68	Stage IV	No	Platinum-Taxane	1-10 mm	Complete response	38.6	8.03333	3.93333	38.6
TCGA-24-2027	validation	51	Stage IV	No	Platinum-Taxane	>10 mm	Complete response	111.233	20.5667	11.9667	111.233
TCGA-13-0894	validation	53	Stage IIIC	No	Platinum-Taxane	1-10 mm	Complete response	50.3	18.8333	7.83333	50.3
TCGA-10-0933	validation	77	Stage IIIC	No	Platinum-Taxane	No Macroscopic disease	Complete response	11.8667	11.8667	7.46667	14.8667
TCGA-24-1463	validation	70	Stage IIIC	No	Platinum-Taxane	>10 mm	Complete response	73.9333	32.3667	28.2667	73.9333
TCGA-24-1551	validation	53	Stage IIIC	No	Platinum-Taxane	1-10 mm	Complete response	52.6333	25.4667	20.9667	52.6333
TCGA-04-1525	validation	47	Stage IIIC	No	Platinum-Taxane	1-10 mm	Complete response	38.9	7.1	0.966667	38.9
TCGA-09-2049	validation	64	Stage IIIC	No	Platinum-Taxane	>10 mm	Complete response	113.967	31.7667	26.0333	113.967
TCGA-30-1880	validation	56	Stage IIIC	No	Platinum-Taxane	No Macroscopic disease	Partial response	58.3667	11.6	6.53333	58.3667
TCGA-29-1768	validation	50	Stage IV	Yes	Platinum-Taxane	>10 mm	Stable Disease	31.6667	18.2333	9.83333	31.7333
TCGA-24-1852	validation	55	Stage IIIC	No	Platinum-Taxane	1-10 mm	Complete response	73.3667	33.6333	29.3667	73.3667
TCGA-13-0792	validation	40	Stage IIIC	No	Platinum-Taxane	No Macroscopic disease	Complete response	37.2333	27.2	21.8667	37.2333
TCGA-25-2409	validation	71	Stage IV	No	Platinum-Taxane	1-10 mm	Complete response	27.3667	10.1333	4.06667	27.3667
TCGA-24-2290	validation	56	Stage IIIC	No	Platinum-Taxane	1-10 mm	Complete response	36.7333	10.8	6.83333	36.7333
TCGA-29-1703	validation	56	Stage IIIC	No	Platinum-Taxane	1-10 mm	Complete response	60.5	10.8	5.36667	60.5
TCGA-25-1628	validation	67	Stage IIIC	No	Platinum-Taxane	1-10 mm	Stable Disease	20.9	9.56667	3.5	20.9
TCGA-24-2289	validation	68	Stage IV	No	Platinum-Taxane	>10 mm	Complete response	68.3	18.9333	12.8333	68.3
TCGA-36-2544	validation	58	Stage IIIC	No	Platinum-Taxane	>10 mm	Partial response	21.2667	10.8333	6.56667	21.2667
TCGA-24-0979	validation	53	Stage IV	No	Platinum-Taxane	>10 mm	Complete response	42.1333	14.2667	8.03333	42.1333
TCGA-29-1702	validation	84	Stage IIIC	No	Platinum	1-10 mm	Complete response	18.9333	9.53333	2.9	24.2667
TCGA-09-1665	validation	73	Stage IIIC	No	Platinum-Taxane	No Macroscopic disease	Complete response	-	15.6	8.66667	42.2
TCGA-36-1571	validation	53	Stage IIIB	No	Platinum-Taxane	No Macroscopic disease	Complete response	23.1667	12.5	6.73333	23.1667
TCGA-36-1570	validation	49	Stage IIIC	No	Platinum-Taxane	>10 mm	Partial response	21.8333	12.5	8.06667	21.8333
TCGA-09-2051	validation	42	Stage IIIC	No	Platinum-Taxane	No Macroscopic disease	Complete response	63.9667	19.4333	14.2667	63.9667
TCGA-24-1105	validation	36	Stage IIIC	No	Platinum-Taxane	1-10 mm	Complete response	48.0667	15.6667	9.73333	48.0667
TCGA-25-1323	validation	72	Stage IIIC	No	Platinum-Taxane	1-10 mm	Complete response	12.1667	12.1667	8.1	13.1667
TCGA-23-2079	validation	46	Stage IIIC	No	Platinum-Taxane	No Macroscopic disease	Complete response	92.9333	9.43333	5.26667	92.9333
TCGA-25-2393	validation	81	Stage IIIC	No	Platinum-Taxane	>10 mm	Partial response	38.5667	10.1667	6.06667	38.5667
TCGA-13-0912	validation	58	Stage IIIC	No	Platinum-Taxane	No Macroscopic disease	Complete response	34.5333	15.6333	10.7333	34.5333
TCGA-09-0365	validation	70	Stage IIIC	No	Platinum-Taxane	No Macroscopic disease	Complete response	-	8.36667	6.03333	9.6
TCGA-25-2400	validation	76	Stage IIIC	No	Platinum-Taxane	No Macroscopic disease	Complete response	42.6	19.2333	13.1667	42.6
TCGA-13-0899	validation	60	Stage IIIC	No	Platinum-Taxane	1-10 mm	Complete response	56.9333	18.2333	14.0333	56.9333
TCGA-31-1950	validation	76	Stage IIIC	No	Platinum	1-10 mm	Partial response	19.0333	11.6333	6.83333	19.0333
TCGA-36-2537	validation	39	Stage IIIC	No	Platinum-Taxane	>10 mm	Partial response	26.2667	14.3667	10.2	26.2667
TCGA-23-1119	validation	64	Stage IIIC	No	Platinum	1-10 mm	Complete response	131.767	112.6	108.433	131.767
TCGA-36-2538	validation	37	Stage IIIB	No	Platinum-Taxane	>10 mm	Complete response	25.4333	17.4333	10.3667	25.4333
TCGA-23-1028	validation	43	Stage IIIC	No	Platinum-Taxane	1-10 mm	Complete response	50.1	4.43333	0.766667	50.1
TCGA-29-1696	validation	43	Stage IIIC	No	Platinum-Taxane	1-10 mm	Partial response	34.1667	11.4	5.7	34.4
TCGA-13-0723	validation	63	Stage IIIC	No	Platinum-Taxane	>10 mm	Progressive Disease	40.1333	7	0.333333	40.1333
TCGA-61-2612	validation	63	Stage IIIC	No	Platinum-Taxane	1-10 mm	Stable Disease	6.43333	5.96667	0.933333	6.43333
TCGA-04-1655	validation	49	Stage IIIB	No	Platinum-Taxane	No Macroscopic disease	NA	-	27.3	22.6667	46
TCGA-13-1488	validation	59	Stage IV	No	Platinum-Taxane	>10 mm	Complete response	71.8	11.7	6.2	71.8
TCGA-04-1361	validation	57	Stage IIIB	No	Platinum-Taxane	No Macroscopic disease	Stable Disease	32.9667	30.9	2.76667	32.9667
TCGA-29-2432	validation	61	Stage IIIC	Yes	Platinum-Taxane	>10 mm	Progressive Disease	12	5.8	0.566667	21.7667
TCGA-13-0803	validation	81	Stage IIIC	No	Platinum-Taxane	No Macroscopic disease	Complete response	44.4667	11.2333	6.33333	44.4667
TCGA-13-1483	validation	61	Stage IIIC	No	Platinum-Taxane	>10 mm	Partial response	29.8333	9.9	1.93333	29.8333
